# Supplementary material
Source: PubMed Central journal article supplement (PMC4445396)
Supplement: NIHMS691913-supplement-Supplemental.pdf [file NIHMS691913-supplement-Supplemental.pdf]

Table 1. Examples of cytokine engineering reported in the literature<sup>A</sup>

| Cytokine  | Mutation(s)                                                                                       | Method                            | Design Objective                                                                | Functional Effect                                                     | Reference |
|-----------|---------------------------------------------------------------------------------------------------|-----------------------------------|---------------------------------------------------------------------------------|-----------------------------------------------------------------------|-----------|
| IL-1      | Chimera of IL-1 $\alpha$ and IL-1 $\beta$                                                         | Yeast display                     | High affinity for IL-1R1                                                        | Inhibition of dry-eye disease                                         | (1)A      |
| IL-2      | Q126K, Q126L; Q126D (Mouse analogs)                                                               | Site-directed mutagenesis         | Lowered affinity for $\gamma$ c                                                 | Reduced complex internalization; IL-2 partial agonist                 | (2)A      |
| IL-2      | L18M, L19S                                                                                        | Cassette mutagenesis              | Lowered affinity for IL-2R $\beta$ and $\gamma$ c                               | Increased recycling of IL-2; Enhanced T cell activation               | (3)A      |
| IL-2      | T51P                                                                                              | Site-directed mutagenesis         | Lowered affinity for IL-2R $\beta$                                              | Reduced complex internalization; Higher activity                      | (4)A      |
| IL-2      | N88R                                                                                              | Site-directed mutagenesis         | Lowered affinity for IL-2R $\beta$                                              | Specific T cell activation                                            | (5)A      |
| IL-2      | N29S, Y31H, K35R, K48E, V69A, N71R, Q74P, N88D, I89V (Mutant 2-4)                                 | Yeast display                     | High affinity for IL-2R $\alpha$                                                | Increased recycling of IL-2; Enhanced T cell activation               | (6)A      |
| IL-2      | P65A, V69A, Q74P, K35L, M39V; P65A; V69A                                                          | Phage display                     | High affinity for IL-2R $\alpha$                                                | Not tested                                                            | (7)A      |
| IL-2      | V69A, Q74P, I128T, V91R, Q126T                                                                    | Yeast display                     | High affinity for IL-2R $\alpha$ , low affinity for IL-2R $\beta$               | T <sub>H</sub> 17 inhibition                                          | (8)A      |
| IL-2      | L80F, R81D, L85V, I86V, I92F (Mutant H9)                                                          | Yeast display                     | High affinity for IL-2R $\beta$                                                 | Anti-tumor activity                                                   | (9)A      |
| IL-2      | R38A, F42A, Y45A, E62A                                                                            | Site-Directed Mutagenesis         | IL-2R $\alpha$ binding inhibition                                               | Melanoma                                                              | (10)A     |
| IL-2      | D20T                                                                                              | Site-directed mutagenesis         | Lowered affinity for IL-2R $\beta$ ; Fused to anti-DNA tumor-targeting antibody | Anti-tumor activity                                                   | (11)A     |
| IL-3      | A101, Y116                                                                                        | Site-directed mutagenesis         | High affinity for IL-3R $\alpha$                                                | Enhanced biological potency                                           | (12)A     |
| IL-3      | >20 mutations; See reference for details                                                          | Site-directed mutagenesis         | High affinity for IL-3R $\alpha$                                                | Enhanced hematopoietic activity                                       | (13)A     |
| IL-4      | Y124D                                                                                             | Site-directed mutagenesis         | Lowered affinity for $\gamma$ c/IL13R $\alpha$                                  | IL-4 antagonist                                                       | (14)A     |
| IL-4      | R121E                                                                                             | Site-directed mutagenesis         | $\gamma$ c binding specificity                                                  | Enhanced Th cell differentiation                                      | (15)A     |
| IL-4      | <i>De novo</i> 4 helix bundle                                                                     | -                                 | Binds IL-4R $\alpha$                                                            | IL-4 antagonist                                                       | (16)A     |
| IL-4      | K117R, T118V, R121Q, E122S, Y124W, S125F, S128G, S129A                                            | Yeast display                     | $\gamma$ c/IL-13R $\alpha$ 1 binding specificity                                | Enhanced Th and dendritic cell differentiation                        | (17)A     |
| IL-5      | E12K                                                                                              | Site-directed mutagenesis         | Lowered affinity for IL-5R $\alpha$                                             | IL-5 antagonist                                                       | (18)A     |
| IL-6      | S176R                                                                                             | Site-directed mutagenesis         | High affinity for IL-6R $\alpha$                                                | IL-6 agonist (transcriptional enhancement)                            | (19)A     |
| IL-6      | Y31D, G35F, S118F, V121D, Q175I, S176R, Q183A, S176R                                              | Site-directed mutagenesis         | Lowered affinity for gp130, high affinity for IL-6R $\alpha$                    | IL-6 antagonist                                                       | (20)A     |
| IL-6      | Q175I, S176R, Q183A                                                                               | Site-directed mutagenesis         | High affinity IL-6R $\alpha$                                                    | IL-6 agonist (transcriptional enhancement)                            | (20)A     |
| IL-6      | Q159E, T162P, F170L, S176A and substitution of human IL-6 residues 43-55 with mouse IL-6 residues | Site-directed mutagenesis         | Lowered affinity for gp130, high affinity for IL-6R $\alpha$                    | IL-6 antagonist                                                       | (21)A     |
| IL-6      | Y31D, G35F, S118R, V121D, L57D, E59F, N60W, Q75Y, S76K, Q175I, S176R, Q183A                       | Site-directed mutagenesis         | Lowered affinity for gp130, high affinity for IL-6R $\alpha$                    | IL-6 antagonist                                                       | (22)A     |
| IL-6      | A56D, I57D, E59F, N60W, Q75Y, S76K                                                                | Phage display                     | High affinity IL-6R $\alpha$                                                    | IL-6 agonist (proliferation enhancement)                              | (23)A     |
| IL-6      | Fusion of IL-6 and IL-6R $\alpha$                                                                 | Single-chain fusion               | High affinity for gp130                                                         | IL-6 agonist (hematopoietic cell expansion enhancement)               | (24)A     |
| LIF       | Q25A, S28A, Q32A                                                                                  | Site-directed mutagenesis         | Lowered affinity for gp130                                                      | LIF antagonist                                                        | (26)A     |
| LIF       | P53G, N54L, N55L, L56Q, D57G, Q29A, G124R                                                         | Phage display                     | High affinity for LIFR, Lowered affinity for gp130                              | LIF antagonist                                                        | (27)A     |
| CNTF      | F152A, K155A, S166D, Q167H                                                                        | Site-directed mutagenesis         | Lowered affinity for CNTFR $\alpha$                                             | CNTF antagonist                                                       | (28)A     |
| IL-7      | W143A                                                                                             | Site-directed mutagenesis         | Lowered affinity for $\gamma$ c chain                                           | IL-7 antagonist                                                       | (29)A     |
| IL-13     | R112D                                                                                             | Site-directed mutagenesis         | High affinity for IL-13R $\alpha$                                               | IL-13 agonist                                                         | (30)A     |
| IL-13     | R112D, E12K                                                                                       | Site-directed mutagenesis         | High affinity for IL-13R $\alpha$ 1, lowered affinity for IL-4R $\alpha$        | IL-13 antagonist                                                      | (31)A     |
| IL-13     | E12K, R66D, S69D                                                                                  | Site-directed mutagenesis         | Lowered affinity for IL-4R $\alpha$                                             | Inhibition of Glioblastoma multiforme                                 | (32)A     |
| IL-13     | K105R                                                                                             | Site-directed mutagenesis         | High affinity for IL-13R $\alpha$ 2                                             | Inhibition of Glioblastoma multiforme                                 | (33)A     |
| IL-15     | Q101D, Q108D                                                                                      | Site-directed mutagenesis         | High affinity for IL-15R $\alpha$                                               | IL-15 antagonist (proliferation and infiltration obstruction)         | (34)A     |
| IL-15     | Fusion of IL-15 and truncated IL-15R $\alpha$ (Residues 1-66)                                     | Single-chain fusion               | High affinity for IL-2R $\beta$ / $\gamma$ c heterodimer                        | IL-15 agonist (proliferation enhancement and prevention of apoptosis) | (35)A     |
| IL-15     | N72D                                                                                              | Site-directed mutagenesis         | High affinity for IL-2R $\beta$                                                 | IL-15 agonist (proliferation enhancement and prevention of apoptosis) | (36)A     |
| IFN       | IFN $\alpha$ 2 with the IFN $\alpha$ 8 C-terminal region                                          | Site-directed mutagenesis         | High affinity for IFNAR2                                                        | Antiviral, antiproliferative activity enhancement                     | (37)A     |
| IFN       | >20 mutations; See reference for details                                                          | Gene shuffling                    | High affinity for IFNAR1, low antiproliferative activity                        | High antiviral activity, low antiproliferative activity               | (38)A     |
| IFN       | H57Y, E58N, Q61S                                                                                  | Phage display                     | High affinity for IFNAR1                                                        | Antiviral, antiproliferative activity enhancement                     | (39)A     |
| IFN       | R120E                                                                                             | Site-directed mutagenesis         | Lowered affinity for IFNAR1                                                     | IFN antagonist                                                        | (40)A     |
| IFN       | IFN $\alpha$ 2 with R120E and IFN $\alpha$ 8CTail                                                 | Site-directed mutagenesis         | Lowered affinity for IFNAR1, High affinity for IFNAR2                           | IFN super antagonist                                                  | (40, 41)A |
| GH        | R167N, D171S, E174S, F176Y, I179T                                                                 | Phage display                     | High affinity for receptor                                                      | Not tested                                                            | (42)A     |
| Prolactin | S61A, D68N, Q73L, K190R, G129R                                                                    | Scintillation proximity assay     | High affinity site I/Low affinity site II for ProlactinR                        | Prolactin antagonist                                                  | (43)A     |
| Leptin    | D23L, L39A, D40A, F41A                                                                            | Yeast display                     | High affinity for LeptinR site I/low affinity for site II                       | Leptin antagonist                                                     | (44)A     |
| EPO       | EPO mimetic peptides                                                                              | Phage display                     | Dimerization of EpoR                                                            | EPO agonist                                                           | (45)A     |
| EPO       | R130A                                                                                             | Site-directed mutagenesis         | Lowered affinity for EpoR                                                       | EPO antagonist                                                        | (46)A     |
| EPO       | EPO agonistic antibodies                                                                          | Lentiviral libraries              | Dimerization of EpoR                                                            | EPO agonist                                                           | (47)A     |
| TPO       | TPO mimetic peptides                                                                              | Phage display                     | Dimerization of TpoR                                                            | TPO agonist                                                           | (48)A     |
| TPO       | TpoR agonistic diabodies                                                                          | Retroviral library                | Dimerization of TpoR                                                            | TPO agonist                                                           | (49)A     |
| TPO       | TpoR agonistic antibodies                                                                         | Lentiviral library                | Dimerization of TpoR                                                            | TPO agonist                                                           | (50)A     |
| GM-CSF    | E21R                                                                                              | Site-directed mutagenesis         | Lowered affinity for $\beta$ c                                                  | GM-CSF antagonist                                                     | (51)A     |
| EGF       | Y13G                                                                                              | Site-directed mutagenesis         | Enhancement of EGF/EGFR recycling                                               | EGF agonist                                                           | (52)A     |
| EGF       | Not provided                                                                                      | Gene shuffling                    | High affinity for EGFR and increased kinase activity                            | EGF agonist                                                           | (53)A     |
| EGF       | S4P, E5K, D11E, H16N, E24G, A25T, K28R, I38V, W50L, E51A                                          | Yeast display                     | High affinity for EGFR                                                          | Not tested                                                            | (54)A     |
| EGF       | D17G, E24K, L26V, K28R, K48T, E51G, L52P; D3Y, L8P, H10Y, M21R, K28S, I38A, K48R, E51G, L52R      | Yeast display                     | Increased EGFFR $k_{on}$                                                        | EGF agonist                                                           | (55)A     |
| EGF       | D3G, I38A, W49R; E5K, L8P, G12E, E23V, K28R, I38T, K48R, E51K                                     | Cell-free protein synthesis array | Increased EGF potency (proliferation/migration assays)                          | EGF agonist                                                           | (56)A     |
| HGF       | K65E, Q95R, N127D, K132N, K137R, K170E, Q173R, N193D (Mutant M2.2)                                | Yeast display                     | High affinity for Met receptor and enhancement of stability                     | HGF partial agonist                                                   | (57)A     |
| GHRH      | P1Y, P2R, T6R, R8A, M9R, R10Y, Y11H, Y12R, F27L, T28R, N29R, S30R                                 | Site-directed mutagenesis         | High affinity for GHRH-R                                                        | Inhibition of Glioblastoma multiforme                                 | (58)A     |
| FGF       | C16S, C83S, C117S                                                                                 | Site-directed mutagenesis         | Enhancement of stability and mitogenic activity                                 | FGF agonist                                                           | (59)A     |
| FGF       | C47A, H93G                                                                                        | Site-directed mutagenesis         | Enhancement of stability and mitogenic activity                                 | FGF agonist                                                           | (60)A     |
| FGF       | K12C, P134C                                                                                       | Site-directed mutagenesis         | Enhancement of stability and mitogenic activity                                 | FGF agonist                                                           | (61)A     |
| KGF       | Deletion of residues 1-23                                                                         | Site-directed mutagenesis         | Enhancement of stability                                                        | Not tested                                                            | (62)A     |
| IGF       | E3A, F49A                                                                                         | Site-directed mutagenesis         | Lowered affinity for IGFBP-1, wild type affinity for IGFBP-3                    | Increased IGF bioavailability and plasma half-life                    | (63)A     |
| PDGF      | S129C; R85S, K86N, R87G on mouse PDGF-A                                                           | Site-directed mutagenesis         | Disruption of dimer formation                                                   | Inhibition of PDGF-A activity                                         | (64, 65)A |
| PDGF      | E156K, Y157P, V158H, R159Q, K160G, K161Q, P162H                                                   | Site-directed mutagenesis         | Lowered affinity for PDGF-R                                                     | Inhibition of 3T3 cell colony formation                               | (66)A     |
| PDGF      | Fusion with a Collagen Binding Domain                                                             | Site-directed mutagenesis         | Targeting to collagen scaffold                                                  | Demonstrate an increase in fibroblast growth rate                     | (67)A     |
| SCF       | Fusion with TPO Mimetic Peptide                                                                   | Site-directed mutagenesis         | Costimulation by TPO and SCF                                                    | Increased cell proliferation                                          | (68)A     |
| SCF       | F63C, V49L/F63L, A165C                                                                            | Site-directed mutagenesis         | Altered monomer/dimer distribution                                              | Altered cell proliferation                                            | (69)A     |
| SCF       | Fusion with M-CSF                                                                                 | Site-directed mutagenesis         | Costimulation by M-CSF and SCF                                                  | Increased cell proliferation                                          | (70)A     |

Abbreviations: A

IL=Interleukin; LIF=Leukemia Inhibitory Factor; CNTF=Ciliary Neurotrophic Factor; IFN=Interferon; GH=Growth Hormone; EPO=Erythropoietin; TPO=Thrombopoietin; GM-CSF=Granulocyte-Macrophage Colony-Stimulating Factor; EGF=Epidermal Growth Factor; HGF=Hepatocyte Growth Factor; GHRH=Growth-Hormone-Releasing Hormone; FGF=Fibroblast Growth Factor; Keratinocyte Growth Factor; IGF=Insulin-Like Growth Factor; PDGF=Platelet-Derived Growth Factor; SCF=Stem Cell Factor; M-CSF=Macrophage Colony-Stimulating Factor

Online-Only Material Literature Cited:

- 1 Hou J, Townson SA, Kovalchin JT, Masci A, Kiner O, Shu Y, King BM, Schirmer E, Golden K, Thomas C, Garcia KC, Zarbis-Papadoitosis G, Furfine ES, Barnes TM. 2013. Design of a superior cytokine antagonist for topical ophthalmic use. *Proc Natl Acad Sci U S A* 110: 3913-8
- 2 Imler JL, Zurawski G. 1992. Receptor binding and internalization of mouse interleukin-2 derivatives that are partial agonists. *J Biol Chem* 267: 13185-90
- 3 Berndt WG, Chang DZ, Smith KA, Ciaridelli TL. 1994. Mutagenic analysis of a receptor contact site on interleukin-2: preparation of an IL-2 analog with increased potency. *Biochemistry* 33: 6571-7
- 4 Chang DZ, Wu Z, Ciaridelli TL. 1996. A point mutation in interleukin-2 that alters ligand internalization. *J Biol Chem* 271: 13349-55
- 5 Shanafelt AB, Lin Y, Shanafelt MC, Forte CP, Dubois-Stringfellow N, Carter C, Gibbons JA, Cheng SL, Delaria KA, Fleischer R, Greve JM, Gundel R, Harris K, Kelly R, Koh B, Li Y, Lantz L, Mak P, Neyer L, Plym MJ, Rocznak S, Serban D, Thrift J, Tsuchiyama L, Wetzel M, Wong M, Zolotorev A. 2000. A T-Rao BM, Driver I, Lauffenburger DA, Wittrup KD. 2005. High-affinity CD25-binding IL-2 mutants potently stimulate persistent T cell growth. *Biochemistry* 44: 10696-701
- 7 Thanos CD, DeLano WL, Wells JA. 2006. Hot-spot mimicry of a cytokine receptor by a small molecule. *Proc Natl Acad Sci U S A* 103: 15422-7
- 8 Liu DV, Maier LM, Hafler DA, Wittrup KD. 2009. Engineered interleukin-2 antagonists for the inhibition of regulatory T cells. *J Immunother* 32: 887-94
- 9 Levin AM, Bates DL, Ring AM, Krieg C, Lin JT, Su L, Moraga I, Raeber ME, Bowman GR, Novick P, Pande VS, Fathman CG, Boyman O, Garcia KC. 2012. Exploiting a natural conformational switch to engineer an interleukin-2 'superkine'. *Nature* 484: 529-33
- 10 Carmentate T, Pacios A, Enamorado M, Moreno E, Garcia-Martinez K, Fuente D, Leon K. 2013. Human IL-2 mutein with higher antitumor efficacy than wild type IL-2. *J Immunol* 190: 6230-8
- 11 Gillissen S, Gnad-Vogi US, Gallerani E, Beck J, Sessa C, Omlin A, Mattiacci MR, Liedert B, Kramer D, Laurent J, Speiser DE, Stupp R. 2013. A phase I dose-escalation study of the immunocytokine EMD 521873 (Selectikine) in patients with advanced solid tumours. *Eur J Cancer* 49: 35-44
- 12 Lopez AF, Shannon MF, Barry S, Phillips JA, Cambareli B, Dottore M, Simmons P, Vadas MA. 1992. A human interleukin 3 analog with increased biological and binding activities. *Proc Natl Acad Sci U S A* 89: 11842-6
- 13 Thomas JW, Baum CM, Hood WF, Klein B, Monahan JB, Paik K, Staten N, Abrams M, McKearn JP. 1995. Potent interleukin 3 receptor agonist with selectively enhanced hemopoietic activity relative to recombinant human interleukin 3. *Proc Natl Acad Sci U S A* 92: 3779-83
- 14 Kruse N, Tony HP, Sebald W. 1992. Conversion of human interleukin-4 into a high affinity antagonist by a single amino acid replacement. *EMBO J* 11: 3237-44
- 15 Shanafelt AB, Forte CP, Kasper J, Sanchez-Pescador L, Wetzel M, Gundel R, Greve JM. 1998. An immune cell-selective interleukin 4 agonist. *Proc Natl Acad Sci U S A* 95: 9454-8
- 16 Laporte SL, Forsyth CM, Cunningham BC, Miercke LJ, Akhavan D, Stroud RM. 2005. De novo design of an IL-4 antagonist and its structure at 1.9 Å. *Proc Natl Acad Sci U S A* 102: 1889-94
- 17 Juntilla IS, Crewst RJ, Moraga I, Bates DL, Wong MN, Alonzo MN, Suhoski MM, Lupardus P, Meier-Schellersheim M, Engelman E, Utz PJ, Fathman CG, Paul WE, Garcia KC. 2012. Redirecting cell-type specific cytokine responses through structure-based engineering of interleukin-4 superkinases. *Nature*
- 18 McKinnon M, Page K, Uings IJ, Banks M, Fattah D, Proudfoot AE, Graber P, Arod C, Fish R, Wells TN, Solari R. 1997. An interleukin 5 mutant distinguishes between two functional responses in human eosinophils. *J Exp Med* 186: 121-9
- 19 Savino R, Lahm A, Giorgio M, Cabibbo A, Tramontano A, Ciliberto G. 1993. Saturation mutagenesis of the human interleukin 6 receptor-binding site: implications for its three-dimensional structure. *Proc Natl Acad Sci U S A* 90: 4067-71
- 20 Savino R, Ciapponi L, Lahm A, Demartis A, Cabibbo A, Toniaati C, Delmastro P, Altamura S, Ciliberto G. 1994. Rational design of a receptor super-antagonist of human interleukin-6. *Embo J* 13: 5863-70
- 21 Cabibbo A, Sporeno E, Toniaati C, Altamura S, Savino R, Paonessa G, Ciliberto G. 1995. Monovalent phage display of human interleukin (hIL)-6: selection of superbinder variants from a complex molecular repertoire in the hIL-6-D-helix. *Gene* 167: 41-7
- 22 Ehlers M, de Hon FD, Bos HK, Horsten U, Kurapkat G, van De Leur HS, Grotzinger J, Wollmer A, Brakenhoff JP, Rose-John S. 1995. Combining two mutations of human interleukin-6 that affect gp130 activation results in a potent interleukin-6 receptor antagonist on human myeloma cells. *J Biol Chem* 270: 23
- 23 Sporeno E, Savino R, Ciapponi L, Paonessa G, Cabibbo A, Lahm A, Pulikki K, Sun RX, Toniaati C, Klein B, Ciliberto G. 1996. Human interleukin-6 receptor super-antagonists with high potency and wide spectrum on multiple myeloma cells. *Blood* 87: 4510-9
- 24 Toniaati C, Cabibbo A, Sporeno E, Salvati AL, Cerretani M, Serafini S, Lahm A, Corfese R, Ciliberto G. 1996. Engineering human interleukin-6 to obtain variants with strongly enhanced bioactivity. *EMBO J* 15: 2726-37
- 25 Fischer M, Goldschmidt J, Peschel C, Brakenhoff JP, Kallen KJ, Wollmer A, Grotzinger J, Rose-John S. 1997. 1. A bioactive designer cytokine for human hematopoietic progenitor cell expansion. *Nat Biotechnol* 15: 142-5
- 26 Hudson KR, Vemalis AB, Heath JK. 1996. Characterization of the receptor binding sites of human leukemia inhibitory factor and creation of antagonists. *J Biol Chem* 271: 11971-8
- 27 Fairlie DU, Uboldi AD, McCoubrie JE, Wang CC, Lee EF, Yao S, De Souza DP, Mifsud S, Metcalf D, Nicola NA, Norton RS, Baca M. 2004. Affinity maturation of leukemia inhibitory factor and conversion to potent antagonists of signaling. *J Biol Chem* 279: 2125-34
- 28 Di Marco A, Gloaguen I, Graziani R, Paonessa G, Saggio I, Hudson KR, Laufer R. 1996. Identification of ciliary neurotrophic factor (CNTF) residues essential for leukemia inhibitory factor receptor binding and generation of CNTF receptor antagonists. *Proc Natl Acad Sci U S A* 93: 9247-52
- 29 Cosenza L, Rosenbach A, White JV, Murphy JR, Smith T. 2000. Comparative model building of interleukin-7 using interleukin-4 as a template: a structural hypothesis that displays atypical surface chemistry in helix D important for receptor activation. *Protein Sci* 9: 916-26
- 30 Oshima Y, Joshi BH, Puri RK. 2000. Conversion of interleukin-13 into a high affinity agonist by a single amino acid substitution. *J Biol Chem* 275: 14375-80
- 31 Oshima Y, Puri RK. 2001. A novel interleukin 13 (IL-13) antagonist that blocks the biological activity of human IL-13 in immune and nonimmune cells. *FASEB J* 15: 1469-71
- 32 Nash KT, Thompson JP, Debinski W. 2001. Molecular targeting of malignant gliomas with novel multiply-mutated interleukin 13-based cytotoxins. *Crit Rev Oncol Hematol* 39: 87-98
- 33 Madhankumar AB, Mintz A, Debinski W. 2004. Interleukin 13 mutants of enhanced avidity toward the glioma-associated receptor, IL13Ralpha2. *Neoplasia* 6: 15-22
- 34 Kim YS, Maslinski W, Zheng XX, Stevens AC, Li XC, Tesch GH, Kelley VR, Strom TB. 1998. Targeting the IL-15 receptor with an antagonist IL-15 mutant/Fc gamma2a protein blocks delayed-type hypersensitivity. *J Immunol* 160: 5742-8
- 35 Mortier E, Quemener A, Vusio P, Lorenzen I, Boublík J, Grotzinger J, Piet A, Jacques Y. 2006. Soluble interleukin-15 receptor alpha (IL-15R alpha)-ushi as a selective and potent agonist of IL-15 action through IL-15R beta/gamma. *Hyperagonist IL-15 x IL-15R alpha fusion proteins*. *J Biol Chem* 281: 1612-9
- 36 Zhu X, Marcus WD, Xu W, Lee HI, Han K, Egan JO, Yovandich JL, Rhode PR, Wong HC. 2009. Novel human interleukin-15 agonists. *J Immunol* 183: 3598-607
- 37 Slutzki M, Jaitin DA, Yehezkel TB, Schreiber G. 2006. Variations in the unstructured C-terminal tail of interferons contribute to differential receptor binding and biological activity. *J Mol Biol* 360: 1019-30
- 38 Brideau-Andersen AD, Huang X, Sun SC, Chen TT, Stark D, Sas JJ, Zadik L, Dawes GN, Gupthill DR, McCord R, Govindarajan S, Roy A, Yang S, Gao J, Chen YH, Skartved NJ, Pedersen AK, Lin D, Locher CP, Rebbapragada I, Jensen AD, Bass SH, Nissen TL, Viswanathan S, Foster GR, Symons JA, Patten
- 39 Kallie E, Jaitin DA, Abramovich R, Schreiber G. 2007. An interferon alpha2 mutant optimized by phage display for IFNAR1 binding confers specifically enhanced antitumor activities. *J Biol Chem* 282: 11602-11
- 40 Pan M, Kallie E, Scaglione BJ, Raveche ES, Schreiber G, Langer JA. 2008. Mutation of the IFNAR1 receptor binding site of human IFN-alpha2 generates type I IFN competitive antagonists. *Biochemistry* 47: 12018-27
- 41 Levin D, Schneider WM, Hoffmann HH, Yarden G, Busetto AG, Manor O, Sharma N, Rice CM, Schreiber G. 2014. Multifaceted activities of type I interferon are revealed by a receptor antagonist. *Sci Signal* 7: ra50
- 42 Lowman HB, Bass SH, Simpson N, Wells JA. 1991. Selecting high-affinity binding proteins by monovalent phage display. *Biochemistry* 30: 10832-8
- 43 Liu Y, Gong W, Breinholt J, Norskov-Lauritsen L, Zhang J, Ma Q, Chen J, Panina S, Guo W, Li T, Zhang J, Kong M, Liu Z, Mao J, Christensen L, Hu S, Wang L. 2011. Discovery of the improved antagonistic prolactin variants by library screening. *Protein Eng Des Sel* 24: 855-60
- 44 Shpilman M, Niv-Spector L, Katz M, Varol C, Solomon G, Ayalon-Soffer M, Boder E, Halpern Z, Elinav E, Gertler A. 2011. Development and characterization of high affinity leptins and leptin antagonists. *J Biol Chem* 286: 4429-42
- 45 Wrighton NC, Farrell FX, Chang R, Kashyap AK, Barbone FP, Mulcahy LS, Johnson DL, Barrett RW, Jolliffe LK, Dower WJ. 1996. Small peptides as potent mimetics of the protein hormone erythropoietin. *Science* 273: 458-64
- 46 Burns S, Arcasoy MO, Li L, Kurian E, Selander K, Emanuel PD, Harris KW. 2002. Purification and characterization of the yeast-expressed erythropoietin mutant Epo (R103A), a specific inhibitor of human primary hematopoietic cell erythropoiesis. *Blood* 99: 4400-5
- 47 Zhang H, Wilson IA, Lerner RA. 2012. Selection of antibodies that regulate phenotype from intracellular combinatorial antibody libraries. *Proc Natl Acad Sci U S A* 109: 15728-33
- 48 Cwirila SE, Balasubramanian P, Duffin DJ, Wagstrom CR, Gates CM, Singer SC, Davis AM, Tansik RL, Mattheakis LC, Boytos CM, Schatz PJ, Baccanani DP, Wrighton NC, Barrett RW, Dower WJ. 1997. Peptide agonist of the thrombopoietin receptor as potent as the natural cytokine. *Science* 276: 1696-9
- 49 Nakano K, Kojima T, Kasutani K, Senoh C, Natori O, Ishii S, Tsunoda H, Hattori K. 2009. Effective screening method of agonistic diabodies based on autocrine growth. *J Immunol Methods* 347: 31-5
- 50 Zhang H, Yea K, Xie J, Ruiz D, Wilson IA, Lerner RA. 2013. Selecting agonists from single cells infected with combinatorial antibody libraries. *Chem Biol* 20: 734-41
- 51 Iversen PO, To LB, Lopez AF. 1996. Apoptosis of hemopoietic cells by the human granulocyte-macrophage colony-stimulating factor mutant E21R. *Proc Natl Acad Sci U S A* 93: 2785-9
- 52 Reddy CC, Niyogi SK, Wells A, Wiley HS, Lauffenburger DA. 1996. Engineering epidermal growth factor for enhanced mitogenic potency. *Nat Biotechnol* 14: 1696-9
- 53 Coco WM, Encell LP, Levinson WE, Crist MJ, Loomis AK, Licato LL, Arensdorf J, Sica N, Pienkos PT, Monticello DJ. 2002. Growth factor engineering by degenerate homoduplex gene family recombination. *Nat Biotechnol* 20: 1246-50
- 54 Cochran JR, Kim YS, Lippow SM, Rao B, Wittrup KD. 2006. Improved mutants from directed evolution are biased to orthogonal substitutions. *Protein Eng Des Sel* 19: 245-53
- 55 Lahti LJ, Lui BH, Beck SE, Lee SS, Ly DP, Longaker MT, Yang GP, Cochran JR. 2011. Engineered epidermal growth factor mutants with faster binding on-rates correlate with enhanced receptor activation. *FEBS Lett* 585: 1135-9
- 56 Lui BH, Cochran JR, Swartz JR. 2011. Discovery of improved EGF agonists using a novel in vitro screening platform. *J Mol Biol* 413: 406-16
- 57 Jones DS, 2nd, Tsai PC, Cochran JR. 2011. Engineering hepatocyte growth factor fragments with high stability and activity as Met receptor agonists and antagonists. *Proc Natl Acad Sci U S A* 108: 13035-40
- 58 Jaszberenyi M, Schally AV, Block NL, Zarandi M, Cai RZ, Vidaurre I, Szalontay L, Jayakumar AR, Rick FG. 2013. Suppression of the proliferation of human U-87 MG glioblastoma cells by new antagonists of growth hormone-releasing hormone in vivo and in vitro. *Target Oncol* 8: 281-90
- 59 Ortega S, Schaeffer MT, Soderman D, DiSalvo J, Linemeyer DL, Gimenez-Gallego G, Thomas KA. 1991. Conversion of cysteine to serine residues alters the activity, stability, and heparin dependence of acidic fibroblast growth factor. *J Biol Chem* 266: 5842-6
- 60 Arakawa T, Horan TP, Nahri LO, Rees DC, Schiffer SG, Holst PL, Prestretski SJ, Tsai LB, Fox GM. 1993. Production and characterization of an analog of acidic fibroblast growth factor with enhanced stability and biological activity. *Protein Eng* 6: 541-6
- 61 Dubey VK, Lee J, Somasundaram T, Blaber S, Blaber M. 2007. Spackling the crack: stabilizing human fibroblast growth factor-1 by targeting the N and C terminus beta-strand interactions. *J Mol Biol* 371: 256-68
- 62 Hsu E, Osslund T, Nybo R, Chen BL, Kenney WC, Morris CF, Arakawa T, Nahri LO. 2006. Enhanced stability of recombinant keratinocyte growth factor by mutagenesis. *Protein Eng Des Sel* 19: 147-53
- 63 Dubaquié Y, Mortensen DL, Intintoli A, Hogue DA, Nakamura G, Rancatore P, Lester P, Sadick MD, Filvaroff E, Felder PJ, Lowman HB. 2001. Binding protein-3-selective insulin-like growth factor I variants: engineering, biodistributions, and clearance. *Endocrinology* 142: 165-73
- 64 Mercola M, Deininger PL, Shamah SM, Porter J, Wang CY, Stiles CD. 1990. Dominant-negative mutants of a platelet-derived growth factor gene. *Genes Dev* 4: 2333-41
- 65 Shamah SM, Stiles CD, Guha A. 1993. Dominant-negative mutants of platelet-derived growth factor revert the transformed phenotype of human astrocytoma cells. *Mol Cell Biol* 13: 7203-12
- 66 Vassbotn FS, Andersson M, Westermark B, Heldin CH, Ostman A. 1993. Reversion of autocrine transformation by a dominant negative platelet-derived growth factor mutant. *Mol Cell Biol* 13: 4066-76
- 67 Lin H, Chen B, Sun W, Zhao Y, Dai J. 2006. The effect of collagen-targeting platelet-derived growth factor on cellularization and vascularization of collagen scaffolds. *Biomaterials* 27: 5708-14
- 68 Su L, Chen S, Yang K, Liu C, Liang Z. 2006. Cloning and expression of human stem cell factor fused with thrombopoietin mimetic peptide in *Escherichia coli*. *Biotechnol Lett* 28: 857-62
- 69 Hsu YR, Wu GM, Mendiaz EA, Syed R, Wypych J, Toso R, Mann MB, Boone TC, Nahri LO, Lu HS, Langley KE. 1997. The majority of stem cell factor exists as monomer under physiological conditions. Implications for dimerization mediating biological activity. *J Biol Chem* 272: 6406-15
- 70 Chen T, Yang J, Wang Y, Zhan C, Zang Y, Qin J. 2005. Design of recombinant stem cell factor-macrophage colony stimulating factor fusion proteins and their biological activity in vitro. *J Comput Aided Mol Des* 19: 319-28
